# Supplementary material for: Conformational changes in hydroxyl functional groups upon hydration: the case study of endo fenchol
Source: Royal Society of Chemistry journal article supplement (doi:10.1039/d0cp06042a), 2020-12-17
Supplement: d0cp06042a1.pdf [file d0cp06042a1.pdf]

**Conformational changes in hydroxyl functional group upon hydration: the case  
study of Endo Fenchol**

Elias M. Neeman, and Thérèse R. Huet

Univ. Lille, CNRS, UMR 8523 - PhLAM - Physique des Lasers Atomes et Molécules, F-59000

Lille, France.

## **Table of contents**

**PIFORM OUTPUTS OF THE FITTED SPECIES**

**CALCULATED STRUCTURES OF CONFORMERS**

**KRAITCHMAN SUBSTITUTIONS - KRA OUTPUT**

## PIFORM OUTPUTS OF THE FITTED SPECIES

# EF-OH:H<sub>2</sub>O

```

-----
=====
Notes
/ instead of : below denotes (o-c)>3*err
-----
=====

```

|     | obs     | o-c     | error      | blends        |
|-----|---------|---------|------------|---------------|
|     |         |         |            | o-c wt        |
| 1:  | 7 0 7   | 6 0 6   | 9000.9709  | -0.0009 0.002 |
| 2:  | 7 1 7   | 6 1 6   | 8982.5334  | -0.0005 0.002 |
| 3:  | 6 0 6   | 5 0 5   | 7765.7572  | -0.0011 0.002 |
| 4:  | 6 1 6   | 5 1 5   | 7729.3502  | -0.0008 0.002 |
| 5:  | 5 0 5   | 4 0 4   | 6533.9642  | -0.0012 0.002 |
| 6:  | 5 1 5   | 4 1 4   | 6469.1748  | 0.0002 0.002  |
| 7:  | 8 1 8   | 7 1 7   | 10231.4772 | -0.0004 0.002 |
| 8:  | 8 0 8   | 7 0 7   | 10240.2154 | -0.0004 0.002 |
| 9:  | 9 0 9   | 8 0 8   | 11482.0684 | -0.0004 0.002 |
| 10: | 9 1 9   | 8 1 8   | 11478.1076 | -0.0004 0.002 |
| 11: | 10 1 10 | 9 1 9   | 12723.5766 | 0.0000 0.002  |
| 12: | 10 0 10 | 9 0 9   | 12725.3153 | -0.0002 0.002 |
| 13: | 11 0 11 | 10 0 10 | 13969.2430 | 0.0000 0.002  |
| 14: | 8 2 7   | 7 2 6   | 10734.7568 | -0.0004 0.002 |
| 15: | 11 1 11 | 10 1 10 | 13968.4972 | -0.0002 0.002 |
| 16: | 4 0 4   | 3 0 3   | 5296.9459  | -0.0012 0.002 |
| 17: | 4 1 4   | 3 1 3   | 5198.8579  | -0.0005 0.002 |
| 18: | 3 0 3   | 2 0 2   | 4034.0966  | 0.0011 0.002  |
| 19: | 5 1 4   | 4 1 3   | 7066.4668  | 0.0000 0.002  |
| 20: | 4 1 3   | 3 1 2   | 5704.4056  | 0.0000 0.002  |
| 21: | 6 1 5   | 5 1 4   | 8378.5576  | 0.0017 0.002  |
| 22: | 6 2 5   | 5 2 4   | 8145.1689  | 0.0001 0.002  |
| 23: | 7 0 7   | 6 1 6   | 8966.8170  | -0.0006 0.002 |
| 24: | 7 1 7   | 6 0 6   | 9016.6870  | -0.0011 0.002 |
| 25: | 6 3 4   | 5 3 3   | 8320.3853  | 0.0014 0.002  |
| 26: | 5 2 3   | 4 2 2   | 7162.6016  | -0.0001 0.002 |
| 27: | 5 3 2   | 4 3 1   | 6989.1854  | 0.0002 0.002  |
| 28: | 5 3 3   | 4 3 2   | 6933.6921  | -0.0003 0.002 |
| 29: | 5 2 4   | 4 2 3   | 6822.6193  | 0.0005 0.002  |
| 30: | 4 2 2   | 3 2 1   | 5685.6717  | 0.0007 0.002  |
| 31: | 4 2 3   | 3 2 2   | 5481.9714  | -0.0004 0.002 |
| 32: | 3 1 2   | 2 1 1   | 4304.7731  | 0.0007 0.002  |
| 33: | 7 2 6   | 6 2 5   | 9448.8147  | -0.0004 0.002 |
| 34: | 7 3 5   | 6 3 4   | 9695.8995  | 0.0003 0.002  |
| 35: | 7 4 4   | 6 4 3   | 9735.5071  | -0.0003 0.002 |
| 36: | 7 5 3   | 6 5 2   | 9713.1161  | -0.0001 0.002 |
| 37: | 7 5 2   | 6 5 1   | 9714.4250  | 0.0011 0.002  |
| 38: | 7 3 4   | 6 3 3   | 9951.0608  | 0.0011 0.002  |
| 39: | 7 2 5   | 6 2 4   | 10043.8701 | 0.0003 0.002  |
| 40: | 8 1 7   | 7 1 6   | 10868.3205 | -0.0005 0.002 |
| 41: | 5 2 3   | 4 1 3   | 8454.5954  | 0.0016 0.002  |
| 42: | 6 3 3   | 5 3 2   | 8454.3044  | 0.0032 0.002  |
| 43: | 8 3 6   | 7 3 5   | 11055.0265 | 0.0002 0.002  |
| 44: | 8 3 5   | 7 3 4   | 11457.5664 | 0.0010 0.002  |
| 45: | 8 2 6   | 7 2 5   | 11418.6209 | 0.0003 0.002  |
| 46: | 8 4 4   | 7 4 3   | 11218.4793 | 0.0011 0.002  |
| 47: | 8 4 5   | 7 4 4   | 11140.9908 | 0.0003 0.002  |
| 48: | 8 5 3   | 7 5 2   | 11125.0532 | 0.0010 0.002  |
| 49: | 9 1 8   | 8 1 7   | 12087.3934 | -0.0007 0.002 |
| 50: | 9 2 8   | 8 2 7   | 12005.9325 | 0.0037 0.002  |
| 51: | 9 3 7   | 8 3 6   | 12394.2326 | -0.0001 0.002 |
| 52: | 6 2 4   | 5 2 3   | 8621.1611  | 0.0005 0.002  |
| 53: | 9 5 5   | 8 5 4   | 12532.6141 | 0.0006 0.002  |
| 54: | 9 1 9   | 8 0 8   | 11485.0855 | -0.0006 0.002 |
| 55/ | 7 2 5   | 6 1 5   | 11674.5913 | -0.0102 0.002 |
| 56: | 7 3 4   | 6 2 4   | 12001.1627 | 0.0004 0.002  |
| 57: | 9 6 4   | 8 6 3   | 12498.8479 | 0.0018 0.002  |
| 58: | 9 4 6   | 8 4 5   | 12541.5453 | 0.0008 0.002  |
| 59: | 9 5 4   | 8 5 3   | 12548.3935 | 0.0000 0.002  |
| 60: | 7 3 5   | 6 2 5   | 12672.4705 | 0.0015 0.002  |
| 61: | 9 4 5   | 8 4 4   | 12705.5284 | 0.0010 0.002  |

|     |    |   |    |    |   |    |            |         |       |         |      |
|-----|----|---|----|----|---|----|------------|---------|-------|---------|------|
| 62: | 9  | 2 | 7  | 8  | 2 | 6  | 12736.0579 | 0.0000  | 0.002 |         |      |
| 63: | 9  | 3 | 6  | 8  | 3 | 5  | 12944.1545 | 0.0007  | 0.002 |         |      |
| 64: | 10 | 2 | 9  | 9  | 2 | 8  | 13266.1400 | -0.0002 | 0.002 |         |      |
| 65: | 10 | 1 | 9  | 9  | 1 | 8  | 13311.0790 | -0.0004 | 0.002 |         |      |
| 66: | 8  | 3 | 5  | 7  | 2 | 5  | 13414.8585 | 0.0006  | 0.002 |         |      |
| 67: | 10 | 3 | 8  | 9  | 3 | 7  | 13712.1219 | 0.0000  | 0.002 |         |      |
| 68: | 10 | 6 | 5  | 9  | 6 | 4  | 13909.6784 | 0.0002  | 0.002 |         |      |
| 69: | 10 | 6 | 4  | 9  | 6 | 3  | 13912.2394 | -0.0004 | 0.002 |         |      |
| 70: | 10 | 4 | 7  | 9  | 4 | 6  | 13931.0427 | 0.0004  | 0.002 |         |      |
| 71: | 10 | 5 | 5  | 9  | 5 | 4  | 13990.5196 | 0.0006  | 0.002 |         |      |
| 72: | 10 | 4 | 6  | 9  | 4 | 5  | 14224.9612 | 0.0009  | 0.002 |         |      |
| 73/ | 10 | 5 | 6  | 9  | 5 | 5  | 13949.1468 | -0.0098 | 0.002 |         |      |
| 74: | 10 | 3 | 7  | 9  | 3 | 6  | 14388.7102 | 0.0003  | 0.002 |         |      |
| 75: | 7  | 5 | 3  | 6  | 4 | 3  | 14355.3523 | 0.0002  | 0.002 |         |      |
| 76: | 7  | 5 | 2  | 6  | 4 | 2  | 14344.8621 | 0.0003  | 0.002 |         |      |
| 77: | 11 | 2 | 10 | 10 | 2 | 9  | 14519.0851 | 0.0000  | 0.002 |         |      |
| 78: | 11 | 1 | 10 | 10 | 1 | 9  | 14542.1985 | -0.0003 | 0.002 |         |      |
| 79: | 11 | 3 | 9  | 10 | 3 | 8  | 15009.5409 | -0.0004 | 0.002 |         |      |
| 80: | 12 | 1 | 12 | 11 | 1 | 11 | 15213.1723 | 0.0005  | 0.002 |         |      |
| 81: | 12 | 0 | 12 | 11 | 0 | 11 | 15213.4859 | 0.0005  | 0.002 |         |      |
| 82: | 11 | 2 | 9  | 10 | 2 | 8  | 15216.5568 | -0.0005 | 0.002 |         |      |
| 83: | 11 | 4 | 7  | 10 | 4 | 6  | 15756.4319 | 0.0011  | 0.002 |         |      |
| 84: | 11 | 3 | 8  | 10 | 3 | 7  | 15777.6902 | 0.0000  | 0.002 |         |      |
| 85: | 7  | 4 | 4  | 6  | 3 | 4  | 13368.6980 | 0.0003  | 0.002 |         |      |
| 86: | 7  | 4 | 3  | 6  | 3 | 3  | 13202.2872 | -0.0006 | 0.002 |         |      |
| 87: | 6  | 4 | 3  | 5  | 3 | 3  | 11953.5747 | 0.0006  | 0.002 |         |      |
| 88: | 6  | 4 | 2  | 5  | 3 | 2  | 11890.5913 | 0.0001  | 0.002 |         |      |
| 89: | 7  | 6 | 1  | 6  | 5 | 1  | 15393.8842 | 0.0000  | 0.002 |         |      |
| 90: | 11 | 4 | 8  | 10 | 4 | 7  | 15303.8528 | 0.0005  | 0.002 |         |      |
| 91: | 12 | 1 | 11 | 11 | 1 | 10 | 15779.0001 | 0.0010  | 0.002 |         |      |
| 92: | 7  | 7 | 1  | 6  | 6 | 0  | 16433.2982 | 0.0006  | 0.002 | -0.0004 | 0.50 |
| 93: | 7  | 7 | 0  | 6  | 6 | 1  | 16433.2982 | -0.0014 | 0.002 | -0.0004 | 0.50 |
| 94: | 5  | 5 | 1  | 4  | 4 | 1  | 11589.8147 | -0.0007 | 0.002 |         |      |
| 95: | 5  | 5 | 0  | 4  | 4 | 0  | 11589.5630 | 0.0011  | 0.002 |         |      |

PARAMETERS IN FIT (values truncated):

|       |          |      |                |   |
|-------|----------|------|----------------|---|
| 10000 | A        | /MHz | 1210.91653(16) | 1 |
| 20000 | B        | /MHz | 752.900591(88) | 2 |
| 30000 | C        | /MHz | 622.335817(68) | 3 |
| 200   | DELTA J  | /kHz | 0.08308(35)    | 4 |
| 2000  | DELTA K  | /kHz | -0.1445(33)    | 5 |
| 1100  | DELTA JK | /kHz | 0.2412(20)     | 6 |
| 40100 | delta J  | /kHz | 0.01321(19)    | 7 |
| 41000 | delta K  | /kHz | 0.0619(37)     | 8 |

MICROWAVE AVG = 0.000013 MHz, IR AVG = 0.00000  
MICROWAVE RMS = 0.001709 MHz, IR RMS = 0.00000  
END OF ITERATION 1 OLD, NEW RMS ERROR= 0.85455 0.85455

distinct frequency lines in fit: 94  
distinct parameters of fit: 8

|                             |    | upper state | lower state | overall |
|-----------------------------|----|-------------|-------------|---------|
| limits of quantum number 1: | 1: | 3 12        | 2 11        | 2 12    |
| limits of quantum number 2: | 2: | 0 7         | 0 6         | 0 7     |
| limits of quantum number 3: | 3: | 0 12        | 0 11        | 0 12    |

frequency range: 4034 16433

Standard errors are obtained by multiplying the previous errors by: 0.893413

PARAMETERS IN FIT WITH STANDARD ERRORS ON THOSE THAT ARE FITTED:  
(values rounded)

|       |          |      |                |   |
|-------|----------|------|----------------|---|
| 10000 | A        | /MHz | 1210.91654(14) | 1 |
| 20000 | B        | /MHz | 752.900591(78) | 2 |
| 30000 | C        | /MHz | 622.335817(60) | 3 |
| 200   | DELTA J  | /kHz | 0.08308(31)    | 4 |
| 2000  | DELTA K  | /kHz | -0.1445(29)    | 5 |
| 1100  | DELTA JK | /kHz | 0.2413(18)     | 6 |

|       |              |             |   |
|-------|--------------|-------------|---|
| 40100 | delta J /kHz | 0.01322(17) | 7 |
| 41000 | delta K /kHz | 0.0619(33)  | 8 |

CORRELATION COEFFICIENTS, C.ij:

|           | A       | B       | C       | -DELTA J | -DELTA K | -DELTA JK | -delta J | -delta K |
|-----------|---------|---------|---------|----------|----------|-----------|----------|----------|
| A         | 1.0000  |         |         |          |          |           |          |          |
| B         | 0.0170  | 1.0000  |         |          |          |           |          |          |
| C         | -0.0415 | -0.4358 | 1.0000  |          |          |           |          |          |
| -DELTA J  | 0.1069  | -0.7207 | 0.0549  | 1.0000   |          |           |          |          |
| -DELTA K  | -0.6181 | 0.0382  | 0.1629  | 0.1306   | 1.0000   |           |          |          |
| -DELTA JK | -0.3040 | 0.1087  | -0.2289 | -0.5208  | -0.4374  | 1.0000    |          |          |
| -delta J  | 0.0746  | -0.8311 | 0.6782  | 0.5981   | 0.0904   | -0.3538   | 1.0000   |          |
| -delta K  | -0.0053 | -0.5390 | 0.4279  | 0.7192   | 0.1849   | -0.4548   | 0.4982   | 1.0000   |

Mean value of |C.ij|, i.ne.j = 0.3351  
Mean value of C.ij, i.ne.j = -0.0572

No correlations with absolute value greater than 0.9950

Worst fitted lines (obs-calc/error):

|     |      |     |      |     |      |     |      |
|-----|------|-----|------|-----|------|-----|------|
| 55: | -5.1 | 73: | -4.9 | 50: | 1.9  | 42: | 1.6  |
| 57: | 0.9  | 21: | 0.8  | 41: | 0.8  | 60: | 0.8  |
| 25: | 0.7  | 16: | -0.6 | 5:  | -0.6 | 95: | 0.6  |
| 38: | 0.6  | 37: | 0.6  | 18: | 0.6  | 3:  | -0.6 |
| 83: | 0.6  | 24: | -0.6 | 46: | 0.6  | 61: | 0.5  |
| 48: | 0.5  | 44: | 0.5  | 91: | 0.5  | 1:  | -0.4 |
| 72: | 0.4  | 58: | 0.4  | 4:  | -0.4 | 94: | -0.3 |
| 49: | -0.3 | 30: | 0.3  | 63: | 0.3  | 32: | 0.3  |
| 54: | -0.3 | 71: | 0.3  | 66: | 0.3  | 53: | 0.3  |
| 23: | -0.3 | 87: | 0.3  | 86: | -0.3 | 80: | 0.2  |
| 52: | 0.2  | 90: | 0.2  | 40: | -0.2 | 29: | 0.2  |
| 17: | -0.2 | 2:  | -0.2 | 82: | -0.2 | 81: | 0.2  |
| 69: | -0.2 | 92: | -0.2 |     |      |     |      |

|     |    |   |   |   |   |   |            |         |       |
|-----|----|---|---|---|---|---|------------|---------|-------|
| 55/ | 7  | 2 | 5 | 6 | 1 | 5 | 11674.5913 | -0.0102 | 0.002 |
| 73/ | 10 | 5 | 6 | 9 | 5 | 5 | 13949.1468 | -0.0098 | 0.002 |
| 50: | 9  | 2 | 8 | 8 | 2 | 7 | 12005.9325 | 0.0037  | 0.002 |
| 42: | 6  | 3 | 3 | 5 | 3 | 2 | 8454.3044  | 0.0032  | 0.002 |
| 57: | 9  | 6 | 4 | 8 | 6 | 3 | 12498.8479 | 0.0018  | 0.002 |
| 21: | 6  | 1 | 5 | 5 | 1 | 4 | 8378.5576  | 0.0017  | 0.002 |
| 41: | 5  | 2 | 3 | 4 | 1 | 3 | 8454.5954  | 0.0016  | 0.002 |
| 60: | 7  | 3 | 5 | 6 | 2 | 5 | 12672.4705 | 0.0015  | 0.002 |
| 25: | 6  | 3 | 4 | 5 | 3 | 3 | 8320.3853  | 0.0014  | 0.002 |
| 16: | 4  | 0 | 4 | 3 | 0 | 3 | 5296.9459  | -0.0012 | 0.002 |

---

/ SPFIT output reformatted with PIFORM

**EF-OD:D<sub>2</sub>O**

```

-----
=====
Notes
/ instead of : below denotes (o-c)>3*err
-----
=====

```

|     | obs     | o-c     | error      | blends        |
|-----|---------|---------|------------|---------------|
| 1:  | 4 0 4   | 3 0 3   | 5105.7394  | -0.0017 0.002 |
| 2:  | 4 1 4   | 3 1 3   | 5005.3666  | -0.0028 0.002 |
| 3:  | 5 0 5   | 4 0 4   | 6300.9955  | 0.0029 0.002  |
| 4:  | 5 1 5   | 4 1 4   | 6230.7973  | -0.0013 0.002 |
| 5:  | 6 1 6   | 5 1 5   | 7446.6931  | -0.0014 0.002 |
| 6:  | 6 0 6   | 5 0 5   | 7488.4973  | -0.0017 0.002 |
| 7:  | 7 1 7   | 6 1 6   | 8655.6773  | -0.0002 0.002 |
| 8:  | 7 0 7   | 6 0 6   | 8678.0583  | 0.0020 0.002  |
| 9:  | 8 1 8   | 7 1 7   | 9860.2325  | 0.0018 0.002  |
| 10: | 8 0 8   | 7 0 7   | 9871.4150  | 0.0025 0.002  |
| 11: | 9 0 9   | 8 0 8   | 11067.5545 | -0.0012 0.002 |
| 12: | 9 1 9   | 8 1 8   | 11062.2211 | 0.0000 0.002  |
| 13: | 10 1 10 | 9 1 9   | 12262.8437 | -0.0021 0.002 |
| 14: | 10 0 10 | 9 0 9   | 12265.3077 | -0.0009 0.002 |
| 15: | 11 1 11 | 10 1 10 | 13462.7895 | 0.0017 0.002  |
| 16: | 11 0 11 | 10 0 10 | 13463.8995 | 0.0023 0.002  |
| 17: | 12 1 12 | 11 1 11 | 14662.3995 | -0.0046 0.002 |
| 18: | 12 0 12 | 11 0 11 | 14662.8977 | 0.0032 0.002  |
| 19: | 6 1 5   | 5 1 4   | 8067.1104  | 0.0001 0.002  |
| 20: | 6 3 4   | 5 3 3   | 7986.8900  | 0.0009 0.002  |
| 21: | 6 2 4   | 5 2 3   | 8263.4176  | 0.0028 0.002  |
| 22: | 7 2 5   | 6 2 4   | 9638.5526  | -0.0029 0.002 |
| 23: | 8 2 7   | 7 2 6   | 10335.9773 | -0.0012 0.002 |
| 24: | 8 1 7   | 7 1 6   | 10485.8781 | 0.0032 0.002  |
| 25: | 8 3 6   | 7 3 5   | 10621.6917 | 0.0004 0.002  |
| 26: | 9 1 8   | 8 1 7   | 11662.4694 | -0.0028 0.002 |

PARAMETERS IN FIT (values truncated):

|       |         |      |                |   |
|-------|---------|------|----------------|---|
| 10000 | A       | /MHz | 1192.7851(22)  | 1 |
| 20000 | B       | /MHz | 721.01710(17)  | 2 |
| 30000 | C       | /MHz | 599.76547(10)  | 3 |
| 200   | DelJ    | /kHz | 0.08088(48)    | 4 |
| 1100  | DelJK   | /kHz | 0.198(17)      | 5 |
| 2000  | DELTA K | /kHz | [-0.144453483] | 6 |
| 40100 | delta J | /kHz | [ 0.013217235] | 7 |
| 41000 | delta K | /kHz | [ 0.061912479] | 8 |

MICROWAVE AVG = -0.000046 MHz, IR AVG = 0.00000  
 MICROWAVE RMS = 0.002199 MHz, IR RMS = 0.00000  
 END OF ITERATION 2 OLD, NEW RMS ERROR= 1.09951 1.09951

distinct frequency lines in fit: 26  
 distinct parameters of fit: 5

|                             | upper state | lower state | overall |
|-----------------------------|-------------|-------------|---------|
| limits of quantum number 1: | 4 12        | 3 11        | 3 12    |
| limits of quantum number 2: | 0 3         | 0 3         | 0 3     |
| limits of quantum number 3: | 4 12        | 3 11        | 3 12    |

frequency range: 5005 14662

Standard errors are obtained by multiplying the previous errors by: 1.223422

PARAMETERS IN FIT WITH STANDARD ERRORS ON THOSE THAT ARE FITTED:  
 (values rounded)

|       |   |      |               |   |
|-------|---|------|---------------|---|
| 10000 | A | /MHz | 1192.7852(28) | 1 |
| 20000 | B | /MHz | 721.01711(21) | 2 |
| 30000 | C | /MHz | 599.76547(12) | 3 |

|       |         |      |                |   |
|-------|---------|------|----------------|---|
| 200   | DelJ    | /kHz | 0.08088(58)    | 4 |
| 1100  | DelJK   | /kHz | 0.198(21)      | 5 |
| 2000  | DELTA K | /kHz | [-0.144453483] | 6 |
| 40100 | delta J | /kHz | [ 0.013217235] | 7 |
| 41000 | delta K | /kHz | [ 0.061912479] | 8 |

CORRELATION COEFFICIENTS, C.ij:

|        | A       | B       | C       | -DelJ   | -DelJK |
|--------|---------|---------|---------|---------|--------|
| A      | 1.0000  |         |         |         |        |
| B      | 0.3882  | 1.0000  |         |         |        |
| C      | -0.5694 | -0.2269 | 1.0000  |         |        |
| -DelJ  | 0.5417  | 0.4004  | -0.8570 | 1.0000  |        |
| -DelJK | -0.6067 | -0.7339 | 0.2154  | -0.5468 | 1.0000 |

Mean value of |C.ij|, i.ne.j = 0.5086  
Mean value of C.ij, i.ne.j = -0.1995

No correlations with absolute value greater than 0.9950

Worst fitted lines (obs-calc/error):

|     |      |     |      |     |      |     |      |
|-----|------|-----|------|-----|------|-----|------|
| 17: | -2.3 | 24: | 1.6  | 18: | 1.6  | 3:  | 1.4  |
| 22: | -1.4 | 26: | -1.4 | 21: | 1.4  | 2:  | -1.4 |
| 10: | 1.2  | 16: | 1.1  | 13: | -1.0 | 8:  | 1.0  |
| 9:  | 0.9  | 1:  | -0.8 | 15: | 0.8  | 6:  | -0.8 |
| 5:  | -0.7 | 4:  | -0.6 | 11: | -0.6 | 23: | -0.6 |
| 14: | -0.4 | 20: | 0.4  | 25: | 0.2  | 7:  | -0.1 |
| 19: | 0.1  | 12: | 0.0  |     |      |     |      |

|     |    |   |    |    |   |    |            |         |       |
|-----|----|---|----|----|---|----|------------|---------|-------|
| 17: | 12 | 1 | 12 | 11 | 1 | 11 | 14662.3995 | -0.0046 | 0.002 |
| 24: | 8  | 1 | 7  | 7  | 1 | 6  | 10485.8781 | 0.0032  | 0.002 |
| 18: | 12 | 0 | 12 | 11 | 0 | 11 | 14662.8977 | 0.0032  | 0.002 |
| 3:  | 5  | 0 | 5  | 4  | 0 | 4  | 6300.9955  | 0.0029  | 0.002 |
| 22: | 7  | 2 | 5  | 6  | 2 | 4  | 9638.5526  | -0.0029 | 0.002 |
| 26: | 9  | 1 | 8  | 8  | 1 | 7  | 11662.4694 | -0.0028 | 0.002 |
| 21: | 6  | 2 | 4  | 5  | 2 | 3  | 8263.4176  | 0.0028  | 0.002 |
| 2:  | 4  | 1 | 4  | 3  | 1 | 3  | 5005.3666  | -0.0028 | 0.002 |
| 10: | 8  | 0 | 8  | 7  | 0 | 7  | 9871.4150  | 0.0025  | 0.002 |
| 16: | 11 | 0 | 11 | 10 | 0 | 10 | 13463.8995 | 0.0023  | 0.002 |

/ SPFIT output reformatted with PIFORM

**EF-OD:HOD**

```

-----
=====
Notes
      / instead of : below denotes (o-c)>3*err
-----
=====
      obs      o-c      error      blends
      o-c      wt
1:  5  1  5    4  1  4      6297.2644  0.0005  0.002
2:  6  1  6    5  1  5      7525.7130 -0.0008  0.002
3:  7  1  7    6  1  6      8747.2459  0.0000  0.002
4:  8  1  8    7  1  7      9964.4077  0.0007  0.002
5:  8  0  8    7  0  7      9974.8874 -0.0001  0.002
6:  9  1  9    8  1  8     11179.0767 -0.0005  0.002
7:  9  0  9    8  0  8     11184.0130  0.0002  0.002
-----

```

PARAMETERS IN FIT (values truncated):

|       |         |      |                  |   |
|-------|---------|------|------------------|---|
| 10000 | A       | /MHz | 1195.996(71)     | 1 |
| 20000 | B       | /MHz | 729.320(11)      | 2 |
| 30000 | C       | /MHz | 606.1714(30)     | 3 |
| 200   | DELTA J | /kHz | 0.0524(81)       | 4 |
| 1100  | DelJK   | /kHz | [ 0.858790325]   | 5 |
| 2000  | DelK    | /kHz | [ 0.056690297]   | 6 |
| 40100 | delJ    | /kHz | [ 0.00625862104] | 7 |
| 41000 | delK    | /kHz | [ 0.136393167]   | 8 |

MICROWAVE AVG = 0.000002 MHz, IR AVG = 0.00000  
 MICROWAVE RMS = 0.000522 MHz, IR RMS = 0.00000  
 END OF ITERATION 1 OLD, NEW RMS ERROR= 0.26113 0.26113

distinct frequency lines in fit: 7  
 distinct parameters of fit: 4

|                             |   | upper state | lower state | overall |
|-----------------------------|---|-------------|-------------|---------|
| limits of quantum number 1: | 5 | 9           | 4 8         | 4 9     |
| limits of quantum number 2: | 0 | 1           | 0 1         | 0 1     |
| limits of quantum number 3: | 5 | 9           | 4 8         | 4 9     |

frequency range: 6297 11184

Standard errors are obtained by multiplying the previous errors by: 0.398883

PARAMETERS IN FIT WITH STANDARD ERRORS ON THOSE THAT ARE FITTED:  
 (values rounded)

|       |         |      |                  |   |
|-------|---------|------|------------------|---|
| 10000 | A       | /MHz | 1195.996(28)     | 1 |
| 20000 | B       | /MHz | 729.3201(45)     | 2 |
| 30000 | C       | /MHz | 606.1714(12)     | 3 |
| 200   | DELTA J | /kHz | 0.0524(32)       | 4 |
| 1100  | DelJK   | /kHz | [ 0.858790325]   | 5 |
| 2000  | DelK    | /kHz | [ 0.056690297]   | 6 |
| 40100 | delJ    | /kHz | [ 0.00625862104] | 7 |
| 41000 | delK    | /kHz | [ 0.136393167]   | 8 |

CORRELATION COEFFICIENTS, C.ij:

|          | A       | B       | C       | -DELTA J |
|----------|---------|---------|---------|----------|
| A        | 1.0000  |         |         |          |
| B        | 0.9062  | 1.0000  |         |          |
| C        | -0.9525 | -0.9880 | 1.0000  |          |
| -DELTA J | 0.8797  | 0.9813  | -0.9803 | 1.0000   |

Mean value of |C.ij|, i.ne.j = 0.9480  
 Mean value of C.ij, i.ne.j = -0.0256  
 No correlations with absolute value greater than 0.9950

Worst fitted lines (obs-calc/error):

|    |       |       |            |         |       |    |      |
|----|-------|-------|------------|---------|-------|----|------|
| 2: | -0.4  | 4:    | 0.3        | 1:      | 0.2   | 6: | -0.2 |
| 7: | 0.1   | 5:    | -0.1       | 3:      | 0.0   |    |      |
| 2: | 6 1 6 | 5 1 5 | 7525.7130  | -0.0008 | 0.002 |    |      |
| 4: | 8 1 8 | 7 1 7 | 9964.4077  | 0.0007  | 0.002 |    |      |
| 1: | 5 1 5 | 4 1 4 | 6297.2644  | 0.0005  | 0.002 |    |      |
| 6: | 9 1 9 | 8 1 8 | 11179.0767 | -0.0005 | 0.002 |    |      |
| 7: | 9 0 9 | 8 0 8 | 11184.0130 | 0.0002  | 0.002 |    |      |
| 5: | 8 0 8 | 7 0 7 | 9974.8874  | -0.0001 | 0.002 |    |      |
| 3: | 7 1 7 | 6 1 6 | 8747.2459  | 0.0000  | 0.002 |    |      |

---

/ SPFIT output reformatted with PIFORM

EF-OH:D<sub>2</sub>O

```

-----
=====
Notes
      / instead of : below denotes (o-c)>3*err
-----
=====

```

|     | obs     | o-c   | error      | blends        |
|-----|---------|-------|------------|---------------|
|     |         |       |            | o-c wt        |
| 1:  | 8 1 8   | 7 1 7 | 9881.4978  | 0.0019 0.002  |
| 2:  | 8 0 8   | 7 0 7 | 9892.6754  | 0.0017 0.002  |
| 3:  | 9 1 9   | 8 1 8 | 11085.5815 | 0.0017 0.002  |
| 4:  | 9 0 9   | 8 0 8 | 11090.8943 | -0.0011 0.002 |
| 5:  | 10 1 10 | 9 1 9 | 12288.2916 | 0.0003 0.002  |
| 6:  | 10 0 10 | 9 0 9 | 12290.7375 | -0.0002 0.002 |
| 7:  | 6 1 6   | 5 1 5 | 7463.6738  | 0.0002 0.002  |
| 8:  | 6 0 6   | 5 0 5 | 7505.7448  | -0.0016 0.002 |
| 9:  | 5 0 5   | 4 0 4 | 6316.3959  | -0.0014 0.002 |
| 10: | 5 1 5   | 4 1 4 | 6245.4937  | -0.0032 0.002 |
| 11: | 7 1 7   | 6 1 6 | 8674.8274  | 0.0003 0.002  |
| 12: | 6 1 5   | 5 1 4 | 8095.1577  | -0.0002 0.002 |
| 13: | 6 2 4   | 5 2 3 | 8297.1771  | -0.0008 0.002 |
| 14: | 8 3 5   | 7 3 4 | 11007.9533 | -0.0026 0.002 |
| 15: | 8 2 6   | 7 2 5 | 11016.6365 | 0.0031 0.002  |
| 16: | 9 1 8   | 8 1 7 | 11695.2741 | -0.0012 0.002 |
| 17: | 10 1 9  | 9 1 8 | 12874.4553 | -0.0028 0.002 |
| 18: | 8 2 7   | 7 2 6 | 10366.0428 | 0.0029 0.002  |
| 19: | 7 2 5   | 6 2 4 | 9677.2221  | 0.0014 0.002  |
| 20: | 7 2 6   | 6 2 5 | 9120.5763  | 0.0003 0.002  |

PARAMETERS IN FIT (values truncated):

|       |          |      |                |   |
|-------|----------|------|----------------|---|
| 10000 | A        | /MHz | 1202.3049(16)  | 1 |
| 20000 | B        | /MHz | 724.43428(11)  | 2 |
| 30000 | C        | /MHz | 600.80980(12)  | 3 |
| 200   | DELTA J  | /kHz | 0.07899(68)    | 4 |
| 2000  | DELTA K  | /kHz | [-0.144453483] | 5 |
| 1100  | DELTA JK | /kHz | [ 0.241259522] | 6 |
| 40100 | delta J  | /kHz | [ 0.013217235] | 7 |
| 41000 | delta K  | /kHz | [ 0.061912479] | 8 |

MICROWAVE AVG = -0.000067 MHz, IR AVG = 0.00000  
 MICROWAVE RMS = 0.001808 MHz, IR RMS = 0.00000  
 END OF ITERATION 2 OLD, NEW RMS ERROR= 0.90386 0.90386

distinct frequency lines in fit: 20  
 distinct parameters of fit: 4

|                             | upper state | lower state | overall |
|-----------------------------|-------------|-------------|---------|
| limits of quantum number 1: | 5 10        | 4 9         | 4 10    |
| limits of quantum number 2: | 0 3         | 0 3         | 0 3     |
| limits of quantum number 3: | 4 10        | 3 9         | 3 10    |

frequency range: 6245 12874

Standard errors are obtained by multiplying the previous errors by: 1.010546

PARAMETERS IN FIT WITH STANDARD ERRORS ON THOSE THAT ARE FITTED:  
 (values rounded)

|       |          |      |                |   |
|-------|----------|------|----------------|---|
| 10000 | A        | /MHz | 1202.3049(17)  | 1 |
| 20000 | B        | /MHz | 724.43428(11)  | 2 |
| 30000 | C        | /MHz | 600.80981(12)  | 3 |
| 200   | DELTA J  | /kHz | 0.07899(68)    | 4 |
| 2000  | DELTA K  | /kHz | [-0.144453483] | 5 |
| 1100  | DELTA JK | /kHz | [ 0.241259522] | 6 |
| 40100 | delta J  | /kHz | [ 0.013217235] | 7 |
| 41000 | delta K  | /kHz | [ 0.061912479] | 8 |

CORRELATION COEFFICIENTS, C.ij:

|          | A       | B       | C       | -DELTA J |
|----------|---------|---------|---------|----------|
| A        | 1.0000  |         |         |          |
| B        | 0.1944  | 1.0000  |         |          |
| C        | -0.3167 | 0.2783  | 1.0000  |          |
| -DELTA J | -0.0529 | -0.5175 | -0.8719 | 1.0000   |

Mean value of |C.ij|, i.ne.j = 0.3719  
 Mean value of C.ij, i.ne.j = -0.2144

No correlations with absolute value greater than 0.9950

Worst fitted lines (obs-calc/error):

|            |          |            |               |
|------------|----------|------------|---------------|
| 10: -1.6   | 15: 1.5  | 18: 1.4    | 17: -1.4      |
| 14: -1.3   | 1: 0.9   | 3: 0.8     | 2: 0.8        |
| 8: -0.8    | 9: -0.7  | 19: 0.7    | 16: -0.6      |
| 4: -0.6    | 13: -0.4 | 20: 0.1    | 5: 0.1        |
| 11: 0.1    | 12: -0.1 | 7: 0.1     | 6: -0.1       |
| 10: 5 1 5  | 4 1 4    | 6245.4937  | -0.0032 0.002 |
| 15: 8 2 6  | 7 2 5    | 11016.6365 | 0.0031 0.002  |
| 18: 8 2 7  | 7 2 6    | 10366.0428 | 0.0029 0.002  |
| 17: 10 1 9 | 9 1 8    | 12874.4553 | -0.0028 0.002 |
| 14: 8 3 5  | 7 3 4    | 11007.9533 | -0.0026 0.002 |
| 1: 8 1 8   | 7 1 7    | 9881.4978  | 0.0019 0.002  |
| 3: 9 1 9   | 8 1 8    | 11085.5815 | 0.0017 0.002  |
| 2: 8 0 8   | 7 0 7    | 9892.6754  | 0.0017 0.002  |
| 8: 6 0 6   | 5 0 5    | 7505.7448  | -0.0016 0.002 |
| 9: 5 0 5   | 4 0 4    | 6316.3959  | -0.0014 0.002 |

# EF-OD:DOH

```

-----
=====
Notes
      / instead of : below denotes (o-c)>3*err
-----
=====

```

|     | obs     | o-c   | error      | blends  | o-c   | wt |
|-----|---------|-------|------------|---------|-------|----|
| 1:  | 6 1 6   | 5 1 5 | 7626.3032  | -0.0021 | 0.002 |    |
| 2:  | 6 0 6   | 5 0 5 | 7663.9794  | 0.0011  | 0.002 |    |
| 3:  | 7 0 7   | 6 0 6 | 8883.0570  | 0.0003  | 0.002 |    |
| 4:  | 7 1 7   | 6 1 6 | 8863.6377  | 0.0026  | 0.002 |    |
| 5:  | 8 1 8   | 7 1 7 | 10096.7099 | 0.0018  | 0.002 |    |
| 6/  | 8 0 8   | 7 0 7 | 10106.0637 | -0.0064 | 0.002 |    |
| 7:  | 9 1 9   | 8 1 8 | 11327.4147 | 0.0000  | 0.002 |    |
| 8:  | 9 0 9   | 8 0 8 | 11331.7326 | 0.0038  | 0.002 |    |
| 9:  | 10 1 10 | 9 1 9 | 12556.9072 | -0.0038 | 0.002 |    |
| 10: | 10 0 10 | 9 0 9 | 12558.8387 | 0.0026  | 0.002 |    |

PARAMETERS IN FIT (values truncated):

|       |          |      |                |   |
|-------|----------|------|----------------|---|
| 10000 | A        | /MHz | 1197.553(26)   | 1 |
| 20000 | B        | /MHz | 740.3972(73)   | 2 |
| 30000 | C        | /MHz | 614.3054(14)   | 3 |
| 200   | DELTA J  | /kHz | 0.0723(38)     | 4 |
| 2000  | DELTA K  | /kHz | [-0.144453483] | 5 |
| 1100  | DELTA JK | /kHz | [ 0.241259522] | 6 |
| 40100 | delta J  | /kHz | [ 0.013217235] | 7 |
| 41000 | delta K  | /kHz | [ 0.061912479] | 8 |

MICROWAVE AVG = -0.000006 MHz, IR AVG = 0.00000  
 MICROWAVE RMS = 0.003061 MHz, IR RMS = 0.00000  
 END OF ITERATION 1 OLD, NEW RMS ERROR= 1.53066 1.53066

distinct frequency lines in fit: 10  
 distinct parameters of fit: 4

|                             | upper state | lower state | overall |
|-----------------------------|-------------|-------------|---------|
| limits of quantum number 1: | 6 10        | 5 9         | 5 10    |
| limits of quantum number 2: | 0 1         | 0 1         | 0 1     |
| limits of quantum number 3: | 6 10        | 5 9         | 5 10    |

frequency range: 7626 12558

Standard errors are obtained by multiplying the previous errors by: 1.976074

PARAMETERS IN FIT WITH STANDARD ERRORS ON THOSE THAT ARE FITTED:  
 (values rounded)

|       |          |      |                |   |
|-------|----------|------|----------------|---|
| 10000 | A        | /MHz | 1197.554(51)   | 1 |
| 20000 | B        | /MHz | 740.397(14)    | 2 |
| 30000 | C        | /MHz | 614.3054(29)   | 3 |
| 200   | DELTA J  | /kHz | 0.0723(75)     | 4 |
| 2000  | DELTA K  | /kHz | [-0.144453483] | 5 |
| 1100  | DELTA JK | /kHz | [ 0.241259522] | 6 |
| 40100 | delta J  | /kHz | [ 0.013217235] | 7 |
| 41000 | delta K  | /kHz | [ 0.061912479] | 8 |

CORRELATION COEFFICIENTS, C.ij:

|          | A       | B       | C       | -DELTA J |
|----------|---------|---------|---------|----------|
| A        | 1.0000  |         |         |          |
| B        | 0.8567  | 1.0000  |         |          |
| C        | -0.9503 | -0.9653 | 1.0000  |          |
| -DELTA J | 0.9274  | 0.9401  | -0.9888 | 1.0000   |

Mean value of |C.ij|, i.ne.j = 0.9381

Mean value of C.ij, i.ne.j = -0.0300

No correlations with absolute value greater than 0.9950

Worst fitted lines (obs-calc/error):

|     |         |    |      |            |         |       |     |
|-----|---------|----|------|------------|---------|-------|-----|
| 6:  | -3.2    | 8: | 1.9  | 9:         | -1.9    | 10:   | 1.3 |
| 4:  | 1.3     | 1: | -1.0 | 5:         | 0.9     | 2:    | 0.6 |
| 3:  | 0.1     | 7: | 0.0  |            |         |       |     |
| 6/  | 8 0 8   | 7  | 0 7  | 10106.0637 | -0.0064 | 0.002 |     |
| 8:  | 9 0 9   | 8  | 0 8  | 11331.7326 | 0.0038  | 0.002 |     |
| 9:  | 10 1 10 | 9  | 1 9  | 12556.9072 | -0.0038 | 0.002 |     |
| 10: | 10 0 10 | 9  | 0 9  | 12558.8387 | 0.0026  | 0.002 |     |
| 4:  | 7 1 7   | 6  | 1 6  | 8863.6377  | 0.0026  | 0.002 |     |
| 1:  | 6 1 6   | 5  | 1 5  | 7626.3032  | -0.0021 | 0.002 |     |
| 5:  | 8 1 8   | 7  | 1 7  | 10096.7099 | 0.0018  | 0.002 |     |
| 2:  | 6 0 6   | 5  | 0 5  | 7663.9794  | 0.0011  | 0.002 |     |
| 3:  | 7 0 7   | 6  | 0 6  | 8883.0570  | 0.0003  | 0.002 |     |
| 7:  | 9 1 9   | 8  | 1 8  | 11327.4147 | 0.0000  | 0.002 |     |

---

/ SPFIT output reformatted with PIFORM

# EF-OH:DOH

```

-----
=====
Notes
/ instead of : below denotes (o-c)>3*err
-----
=====

```

|             | obs        | o-c     | error | blends |
|-------------|------------|---------|-------|--------|
| 1: 7 1 7    | 8884.2397  | 0.0005  | 0.002 |        |
| 2: 7 0 7    | 8903.7234  | 0.0008  | 0.002 |        |
| 3: 8 1 8    | 10119.6178 | 0.0033  | 0.002 |        |
| 4: 8 0 8    | 10128.9781 | 0.0014  | 0.002 |        |
| 5: 6 1 6    | 7644.5507  | -0.0029 | 0.002 |        |
| 6: 6 0 6    | 7682.4709  | -0.0016 | 0.002 |        |
| 7: 9 0 9    | 11356.9021 | -0.0001 | 0.002 |        |
| 8: 9 1 9    | 11352.6004 | -0.0010 | 0.002 |        |
| 9: 10 1 10  | 12584.3715 | 0.0015  | 0.002 |        |
| 10: 10 0 10 | 12586.2845 | 0.0011  | 0.002 |        |
| 11: 11 1 11 | 13815.5553 | -0.0001 | 0.002 |        |
| 12: 11 0 11 | 13816.3848 | -0.0015 | 0.002 |        |
| 13: 12 1 12 | 15046.4735 | -0.0008 | 0.002 |        |
| 14: 12 0 12 | 15046.8286 | 0.0001  | 0.002 |        |
| 15: 9 3 7   | 12255.6099 | -0.0015 | 0.002 |        |
| 16: 9 1 8   | 11961.6499 | 0.0002  | 0.002 |        |
| 17: 9 2 8   | 11875.7462 | 0.0002  | 0.002 |        |
| 18: 8 3 6   | 10929.7452 | 0.0019  | 0.002 |        |
| 19: 8 1 7   | 10755.9264 | -0.0019 | 0.002 |        |
| 20: 8 2 7   | 10617.5247 | -0.0010 | 0.002 |        |
| 21: 7 2 5   | 9928.8395  | 0.0022  | 0.002 |        |
| 22: 7 1 6   | 9539.3617  | 0.0017  | 0.002 |        |
| 23: 7 2 6   | 9344.6336  | 0.0006  | 0.002 |        |
| 24: 6 1 5   | 8288.7475  | 0.0002  | 0.002 |        |
| 25: 5 2 3   | 7076.5849  | -0.0019 | 0.002 |        |
| 26: 5 1 4   | 6988.2680  | -0.0018 | 0.002 |        |
| 27: 5 1 5   | 6397.8600  | -0.0012 | 0.002 |        |

## PARAMETERS IN FIT (values truncated):

|       |          |      |                |   |
|-------|----------|------|----------------|---|
| 10000 | A        | /MHz | 1207.2160(20)  | 1 |
| 20000 | B        | /MHz | 744.00294(16)  | 2 |
| 30000 | C        | /MHz | 615.44832(11)  | 3 |
| 200   | DELTA J  | /kHz | 0.08250(50)    | 4 |
| 1100  | DELTA JK | /kHz | 0.221(14)      | 5 |
| 2000  | DELTA K  | /kHz | [-0.144453483] | 6 |
| 40100 | delta J  | /kHz | [ 0.013217235] | 7 |
| 41000 | delta K  | /kHz | [ 0.061912479] | 8 |

MICROWAVE AVG = -0.000062 MHz, IR AVG = 0.00000  
 MICROWAVE RMS = 0.001516 MHz, IR RMS = 0.00000  
 END OF ITERATION 1 OLD, NEW RMS ERROR= 0.75821 0.75821

distinct frequency lines in fit: 27  
 distinct parameters of fit: 5

|                             | upper state | lower state | overall |
|-----------------------------|-------------|-------------|---------|
| limits of quantum number 1: | 5 12        | 4 11        | 4 12    |
| limits of quantum number 2: | 0 3         | 0 3         | 0 3     |
| limits of quantum number 3: | 3 12        | 2 11        | 2 12    |

frequency range: 6397 15046

Standard errors are obtained by multiplying the previous errors by: 0.839963

## PARAMETERS IN FIT WITH STANDARD ERRORS ON THOSE THAT ARE FITTED: (values rounded)

|       |   |      |               |   |
|-------|---|------|---------------|---|
| 10000 | A | /MHz | 1207.2160(16) | 1 |
| 20000 | B | /MHz | 744.00295(13) | 2 |

|       |          |      |                |   |
|-------|----------|------|----------------|---|
| 30000 | C        | /MHz | 615.448327(92) | 3 |
| 200   | DELTA J  | /kHz | 0.08250(41)    | 4 |
| 1100  | DELTA JK | /kHz | 0.221(12)      | 5 |
| 2000  | DELTA K  | /kHz | [-0.144453483] | 6 |
| 40100 | delta J  | /kHz | [ 0.013217235] | 7 |
| 41000 | delta K  | /kHz | [ 0.061912479] | 8 |

CORRELATION COEFFICIENTS, C.ij:

|           | A       | B       | C       | -DELTA J | -DELTA JK |
|-----------|---------|---------|---------|----------|-----------|
| A         | 1.0000  |         |         |          |           |
| B         | 0.2735  | 1.0000  |         |          |           |
| C         | -0.5744 | -0.1923 | 1.0000  |          |           |
| -DELTA J  | 0.5561  | 0.3433  | -0.8862 | 1.0000   |           |
| -DELTA JK | -0.6205 | -0.6992 | 0.2629  | -0.5481  | 1.0000    |

Mean value of |C.ij|, i.ne.j = 0.4956

Mean value of C.ij, i.ne.j = -0.2085

No correlations with absolute value greater than 0.9950

Worst fitted lines (obs-calc/error):

|     |      |     |      |     |      |     |      |
|-----|------|-----|------|-----|------|-----|------|
| 3:  | 1.6  | 5:  | -1.4 | 21: | 1.1  | 19: | -0.9 |
| 18: | 0.9  | 25: | -0.9 | 26: | -0.9 | 22: | 0.8  |
| 6:  | -0.8 | 15: | -0.8 | 12: | -0.8 | 9:  | 0.8  |
| 4:  | 0.7  | 27: | -0.6 | 10: | 0.6  | 20: | -0.5 |
| 8:  | -0.5 | 2:  | 0.4  | 13: | -0.4 | 23: | 0.3  |
| 1:  | 0.2  | 24: | 0.1  | 17: | 0.1  | 16: | 0.1  |
| 14: | 0.1  | 11: | -0.1 | 7:  | -0.1 |     |      |

|     |   |   |   |   |   |   |            |         |       |
|-----|---|---|---|---|---|---|------------|---------|-------|
| 3:  | 8 | 1 | 8 | 7 | 1 | 7 | 10119.6178 | 0.0033  | 0.002 |
| 5:  | 6 | 1 | 6 | 5 | 1 | 5 | 7644.5507  | -0.0029 | 0.002 |
| 21: | 7 | 2 | 5 | 6 | 2 | 4 | 9928.8395  | 0.0022  | 0.002 |
| 19: | 8 | 1 | 7 | 7 | 1 | 6 | 10755.9264 | -0.0019 | 0.002 |
| 18: | 8 | 3 | 6 | 7 | 3 | 5 | 10929.7452 | 0.0019  | 0.002 |
| 25: | 5 | 2 | 3 | 4 | 2 | 2 | 7076.5849  | -0.0019 | 0.002 |
| 26: | 5 | 1 | 4 | 4 | 1 | 3 | 6988.2680  | -0.0018 | 0.002 |
| 22: | 7 | 1 | 6 | 6 | 1 | 5 | 9539.3617  | 0.0017  | 0.002 |
| 6:  | 6 | 0 | 6 | 5 | 0 | 5 | 7682.4709  | -0.0016 | 0.002 |
| 15: | 9 | 3 | 7 | 8 | 3 | 6 | 12255.6099 | -0.0015 | 0.002 |

---

/ SPFIT output reformatted with PIFORM

**CALCULATED STRUCTURES OF CONFORMERS  
(MP2/6-311++G(d,p))**

## Conf. 1

Standard orientation:

| Center<br>Number | Atomic<br>Number | Atomic<br>Type | Coordinates (Angstroms) |           |           |
|------------------|------------------|----------------|-------------------------|-----------|-----------|
|                  |                  |                | X                       | Y         | Z         |
| 1                | 6                | 0              | 1.244931                | 0.836360  | 0.217850  |
| 2                | 6                | 0              | 1.825550                | 0.308549  | -1.115530 |
| 3                | 6                | 0              | 1.777146                | -1.239423 | -0.966025 |
| 4                | 6                | 0              | 1.005157                | -1.421670 | 0.352197  |
| 5                | 6                | 0              | 1.639779                | -0.292662 | 1.187094  |
| 6                | 6                | 0              | -0.464010               | -0.936173 | 0.202189  |
| 7                | 6                | 0              | -0.279822               | 0.623430  | 0.219653  |
| 8                | 6                | 0              | -1.152969               | -1.443147 | -1.067871 |
| 9                | 6                | 0              | -1.304099               | -1.381429 | 1.405743  |
| 10               | 6                | 0              | 1.660621                | 2.250966  | 0.574166  |
| 11               | 8                | 0              | -0.992188               | 1.354666  | -0.782271 |
| 12               | 1                | 0              | 1.266934                | 0.670879  | -1.988377 |
| 13               | 1                | 0              | 2.852977                | 0.669146  | -1.238977 |
| 14               | 1                | 0              | 1.318890                | -1.746307 | -1.818352 |
| 15               | 1                | 0              | 2.789113                | -1.643942 | -0.852030 |
| 16               | 1                | 0              | 1.072927                | -2.433004 | 0.768671  |
| 17               | 1                | 0              | 2.726769                | -0.398936 | 1.289376  |
| 18               | 1                | 0              | 1.199186                | -0.163998 | 2.181845  |
| 19               | 1                | 0              | -0.680767               | 1.024693  | 1.158810  |
| 20               | 1                | 0              | -0.687928               | -1.078339 | -1.990586 |
| 21               | 1                | 0              | -1.109062               | -2.538338 | -1.096974 |
| 22               | 1                | 0              | -2.205532               | -1.143236 | -1.075198 |
| 23               | 1                | 0              | -1.443158               | -2.469261 | 1.391551  |
| 24               | 1                | 0              | -2.289762               | -0.904189 | 1.374212  |
| 25               | 1                | 0              | -0.820447               | -1.114518 | 2.351640  |
| 26               | 1                | 0              | 1.283037                | 2.963235  | -0.167849 |
| 27               | 1                | 0              | 2.752557                | 2.338522  | 0.611310  |
| 28               | 1                | 0              | 1.258260                | 2.538148  | 1.552821  |
| 29               | 1                | 0              | -0.716992               | 1.021343  | -1.642859 |
| 30               | 1                | 0              | -2.809735               | 1.176315  | -0.362245 |
| 31               | 8                | 0              | -3.668230               | 0.862661  | -0.037325 |
| 32               | 1                | 0              | -4.187633               | 1.664364  | 0.053184  |

-----

Rotational constants (GHz):            1.2258860            0.7617266            0.6300349

## Conf. 2

Standard orientation:

| Center<br>Number | Atomic<br>Number | Atomic<br>Type | Coordinates (Angstroms) |           |           |
|------------------|------------------|----------------|-------------------------|-----------|-----------|
|                  |                  |                | X                       | Y         | Z         |
| 1                | 6                | 0              | 1.245861                | 0.824759  | 0.218302  |
| 2                | 6                | 0              | 1.809611                | 0.307219  | -1.124867 |
| 3                | 6                | 0              | 1.765998                | -1.240440 | -0.977146 |
| 4                | 6                | 0              | 0.999495                | -1.427092 | 0.343300  |
| 5                | 6                | 0              | 1.639087                | -0.306710 | 1.184940  |
| 6                | 6                | 0              | -0.469169               | -0.935865 | 0.195889  |
| 7                | 6                | 0              | -0.279346               | 0.615700  | 0.220748  |
| 8                | 6                | 0              | -1.151627               | -1.442600 | -1.078464 |
| 9                | 6                | 0              | -1.306391               | -1.384988 | 1.400546  |
| 10               | 6                | 0              | 1.674660                | 2.235046  | 0.583496  |
| 11               | 8                | 0              | -0.969520               | 1.251243  | -0.866412 |
| 12               | 1                | 0              | 1.210596                | 0.665113  | -1.968312 |
| 13               | 1                | 0              | 2.834828                | 0.669414  | -1.263906 |
| 14               | 1                | 0              | 1.300122                | -1.742685 | -1.827682 |
| 15               | 1                | 0              | 2.778177                | -1.646739 | -0.869094 |
| 16               | 1                | 0              | 1.060357                | -2.441189 | 0.754039  |
| 17               | 1                | 0              | 2.726262                | -0.414825 | 1.283423  |
| 18               | 1                | 0              | 1.200720                | -0.183304 | 2.181531  |
| 19               | 1                | 0              | -0.684859               | 1.015430  | 1.163925  |
| 20               | 1                | 0              | -0.729409               | -1.005904 | -1.985953 |
| 21               | 1                | 0              | -1.050749               | -2.533440 | -1.133130 |
| 22               | 1                | 0              | -2.219131               | -1.203375 | -1.055307 |
| 23               | 1                | 0              | -1.455032               | -2.471176 | 1.372075  |
| 24               | 1                | 0              | -2.288268               | -0.899493 | 1.380044  |
| 25               | 1                | 0              | -0.816841               | -1.135061 | 2.348089  |
| 26               | 1                | 0              | 1.354210                | 2.961119  | -0.176028 |
| 27               | 1                | 0              | 2.766109                | 2.302739  | 0.651727  |
| 28               | 1                | 0              | 1.249409                | 2.538683  | 1.547673  |
| 29               | 1                | 0              | -0.741637               | 2.187270  | -0.821983 |
| 30               | 1                | 0              | -2.813494               | 1.080527  | -0.410844 |
| 31               | 8                | 0              | -3.646769               | 0.963644  | 0.070688  |
| 32               | 1                | 0              | -4.320137               | 1.067617  | -0.604954 |

Rotational constants (GHz):      1.2236414      0.7633667      0.6325645

### Conf. 3

Standard orientation:

| Center<br>Number | Atomic<br>Number | Atomic<br>Type | Coordinates (Angstroms) |           |           |
|------------------|------------------|----------------|-------------------------|-----------|-----------|
|                  |                  |                | X                       | Y         | Z         |
| 1                | 6                | 0              | -0.125647               | 0.017124  | -1.018099 |
| 2                | 6                | 0              | -0.472147               | 1.280613  | -0.219412 |
| 3                | 6                | 0              | 0.361860                | 1.290334  | 1.082875  |
| 4                | 6                | 0              | -0.307693               | 0.201780  | 1.969700  |
| 5                | 6                | 0              | -1.353660               | -0.409152 | 1.020257  |
| 6                | 6                | 0              | -1.855508               | 0.865210  | 0.314180  |
| 7                | 6                | 0              | -0.656785               | -1.171842 | -0.140371 |
| 8                | 6                | 0              | -0.385215               | 2.558124  | -1.033843 |
| 9                | 6                | 0              | 0.451652                | -2.118992 | 0.323961  |
| 10               | 6                | 0              | -1.689205               | -1.987312 | -0.928953 |
| 11               | 8                | 0              | 1.273337                | -0.006675 | -1.329852 |
| 12               | 1                | 0              | 1.418591                | 1.085807  | 0.898972  |
| 13               | 1                | 0              | 0.292279                | 2.280417  | 1.548382  |
| 14               | 1                | 0              | 0.403751                | -0.527038 | 2.363724  |
| 15               | 1                | 0              | -0.819105               | 0.657859  | 2.824903  |
| 16               | 1                | 0              | -2.111467               | -1.018187 | 1.526634  |
| 17               | 1                | 0              | -2.584256               | 0.686280  | -0.484210 |
| 18               | 1                | 0              | -2.267591               | 1.603229  | 1.013044  |
| 19               | 1                | 0              | -0.683554               | 0.047747  | -1.967414 |
| 20               | 1                | 0              | 0.641258                | 2.725496  | -1.378043 |
| 21               | 1                | 0              | -0.691160               | 3.421485  | -0.432187 |
| 22               | 1                | 0              | -1.035503               | 2.504918  | -1.915367 |
| 23               | 1                | 0              | 1.306753                | -1.600095 | 0.760325  |
| 24               | 1                | 0              | 0.049682                | -2.815745 | 1.069456  |
| 25               | 1                | 0              | 0.822875                | -2.718364 | -0.516664 |
| 26               | 1                | 0              | -1.237276               | -2.402360 | -1.839075 |
| 27               | 1                | 0              | -2.057740               | -2.824396 | -0.324424 |
| 28               | 1                | 0              | -2.548871               | -1.379142 | -1.228643 |
| 29               | 1                | 0              | 1.410923                | -0.705142 | -1.978654 |
| 30               | 8                | 0              | 3.597301                | -0.314780 | 0.302216  |
| 31               | 1                | 0              | 2.821962                | -0.110555 | -0.241135 |
| 32               | 1                | 0              | 4.097432                | 0.504101  | 0.299694  |

Rotational constants (GHz):            1.0040261            0.8534486            0.6928658

## Conf. 4

Standard orientation:

| Center<br>Number | Atomic<br>Number | Atomic<br>Type | Coordinates (Angstroms) |           |           |
|------------------|------------------|----------------|-------------------------|-----------|-----------|
|                  |                  |                | X                       | Y         | Z         |
| 1                | 6                | 0              | -0.109676               | 0.019668  | -1.017238 |
| 2                | 6                | 0              | -0.565622               | 1.247185  | -0.207254 |
| 3                | 6                | 0              | -1.933141               | 0.717886  | 0.262719  |
| 4                | 6                | 0              | -1.357578               | -0.521173 | 0.976155  |
| 5                | 6                | 0              | -0.548999               | -1.210044 | -0.160009 |
| 6                | 6                | 0              | -0.408956               | 0.163020  | 1.975584  |
| 7                | 6                | 0              | 0.227158                | 1.294514  | 1.118554  |
| 8                | 6                | 0              | -0.549525               | 2.543487  | -0.997309 |
| 9                | 6                | 0              | -1.463834               | -2.126031 | -0.982138 |
| 10               | 6                | 0              | 0.630236                | -2.043608 | 0.347142  |
| 11               | 8                | 0              | 1.289383                | -0.021664 | -1.326519 |
| 12               | 1                | 0              | 1.299184                | 1.149909  | 0.960160  |
| 13               | 1                | 0              | 0.093659                | 2.274464  | 1.591330  |
| 14               | 1                | 0              | 0.329472                | -0.511824 | 2.413491  |
| 15               | 1                | 0              | -0.996818               | 0.584061  | 2.799163  |
| 16               | 1                | 0              | -2.083797               | -1.197263 | 1.441664  |
| 17               | 1                | 0              | -2.435188               | 1.409011  | 0.950635  |
| 18               | 1                | 0              | -2.609908               | 0.488978  | -0.568542 |
| 19               | 1                | 0              | -0.666221               | 0.010486  | -1.968106 |
| 20               | 1                | 0              | 1.393573                | -1.440859 | 0.841957  |
| 21               | 1                | 0              | 0.265706                | -2.791721 | 1.061552  |
| 22               | 1                | 0              | 1.106386                | -2.570496 | -0.486546 |
| 23               | 1                | 0              | -1.759388               | -3.000615 | -0.390696 |
| 24               | 1                | 0              | -0.940043               | -2.480596 | -1.878129 |
| 25               | 1                | 0              | -2.374039               | -1.608601 | -1.303144 |
| 26               | 1                | 0              | 0.475732                | 2.829430  | -1.266050 |
| 27               | 1                | 0              | -0.969792               | 3.363719  | -0.404886 |
| 28               | 1                | 0              | -1.135844               | 2.451292  | -1.920100 |
| 29               | 1                | 0              | 1.453685                | 0.679177  | -1.967301 |
| 30               | 1                | 0              | 2.828270                | -0.056409 | -0.221450 |
| 31               | 8                | 0              | 3.600204                | 0.100710  | 0.342067  |
| 32               | 1                | 0              | 4.088296                | -0.723933 | 0.293391  |

Rotational constants (GHz):      1.0029890      0.8536878      0.6939238

## KRAITCHMAN SUBSTITUTIONS - KRA OUTPUT

-----  
Fenchol-hydrate  
-----

Parent species (EFOH:DOH)

Planar calculation will be made from I.a and I.b

-----  
**EFOH:D2O->EFOH:DOH**  
-----

The parent species:

|                 |               |              |              |
|-----------------|---------------|--------------|--------------|
| X, Y, Z =       | 1207.21600000 | 744.00295000 | 615.44832700 |
| eX, eY, eZ =    | 0.00160000    | 0.00013000   | 0.00009200   |
| IX, IY, IZ =    | 418.63179829  | 679.27016284 | 821.15586773 |
| eIX, eIY, eIZ = | 0.00055484    | 0.00011869   | 0.00012275   |
| PX, PY, PZ =    | 540.89711614  | 280.25875159 | 138.37304670 |
| Mass =          | 173.27460000  |              |              |

The isotopic species:

|                 |               |              |              |
|-----------------|---------------|--------------|--------------|
| X, Y, Z =       | 1202.30490000 | 724.43428000 | 600.80981000 |
| eX, eY, eZ =    | 0.00170000    | 0.00011000   | 0.00012000   |
| IX, IY, IZ =    | 420.34179932  | 697.61884404 | 841.16303793 |
| eIX, eIY, eIZ = | 0.00059434    | 0.00010593   | 0.00016801   |
| PX, PY, PZ =    | 559.22004133  | 281.94299661 | 138.39880272 |
| Mass change =   | 1.00627670    |              |              |
| Total mass =    | 174.28087670  |              |              |
| M DM/ (M+DM) =  | 1.00046658    |              |              |

KRAITCHMAN RESULTS:

|               |                    |  |                    |                    |                    |
|---------------|--------------------|--|--------------------|--------------------|--------------------|
|               | a                  |  | b                  |                    |                    |
| PLANAR:       | 4.26847 +- 0.00002 |  | 1.35260 +- 0.00032 |                    |                    |
| +Costain err. | 4.26847 +- 0.00035 |  | 1.35260 +- 0.00115 |                    |                    |
|               | a                  |  | b                  | c                  |                    |
| NONPLANAR:    | 4.26554 +- 0.00005 |  | 1.34219 +- 0.00017 | 0.16503 +- 0.00137 |                    |
| +Costain err. | 4.26554 +- 0.00036 |  | 1.34219 +- 0.00113 | 0.16503 +- 0.00919 |                    |
|               |                    |  |                    | R=                 | 4.47477 +- 0.00059 |
| DIX,DIY,DIZ = | 1.71000104         |  | 18.34868120        |                    | 20.00717020        |
| DPX,DPY,DPZ = | 18.32292519        |  | 1.68424502         |                    | 0.02575602         |
| IXY,IXZ,IYZ = | -260.63836455      |  | -402.52406944      |                    | -141.88570489      |

-----

-----  
Fenchol-hydrate  
-----

parent species (EFOD:DOH)

Planar calculation will be made from I.a and I.b

-----  
**EF-OD:D2O->EF-OD:DOH**  
-----

The parent species:

|                 |               |              |              |
|-----------------|---------------|--------------|--------------|
| X, Y, Z =       | 1197.55400000 | 740.39700000 | 614.30540000 |
| eX, eY, eZ =    | 0.05100000    | 0.01400000   | 0.00290000   |
| IX, IY, IZ =    | 422.00936659  | 682.57840726 | 822.68364400 |
| eIX, eIY, eIZ = | 0.01797203    | 0.01290672   | 0.00388371   |
| PX, PY, PZ =    | 541.62634233  | 281.05730167 | 140.95206493 |
| Mass =          | 174.28083000  |              |              |

The isotopic species:

|                 |               |              |              |
|-----------------|---------------|--------------|--------------|
| X, Y, Z =       | 1192.78520000 | 721.01711000 | 599.76547000 |
| eX, eY, eZ =    | 0.00280000    | 0.00021000   | 0.00012000   |
| IX, IY, IZ =    | 423.69657588  | 700.92512090 | 842.62771080 |
| eIX, eIY, eIZ = | 0.00099461    | 0.00020415   | 0.00016859   |
| PX, PY, PZ =    | 559.92812791  | 282.69958289 | 140.99699299 |
| Mass change =   | 1.00627670    |              |              |
| Total mass =    | 175.28710670  |              |              |
| M DM/ (M+DM) =  | 1.00049993    |              |              |

KRAITCHMAN RESULTS:

|               |                    |  |                    |                    |                    |
|---------------|--------------------|--|--------------------|--------------------|--------------------|
|               | a                  |  | b                  |                    |                    |
| PLANAR:       | 4.26835 +- 0.00151 |  | 1.34354 +- 0.00717 |                    |                    |
| +Costain err. | 4.26835 +- 0.00155 |  | 1.34354 +- 0.00725 |                    |                    |
|               | a                  |  | b                  | c                  |                    |
| NONPLANAR:    | 4.26325 +- 0.00131 |  | 1.32521 +- 0.00454 | 0.21796 +- 0.02727 |                    |
| +Costain err. | 4.26325 +- 0.00136 |  | 1.32521 +- 0.00468 | 0.21796 +- 0.02813 |                    |
|               |                    |  |                    | R=                 | 4.46979 +- 0.00234 |
| DIX,DIY,DIZ = | 1.68720929         |  | 18.34671364        |                    | 19.94406680        |
| DPX,DPY,DPZ = | 18.30178558        |  | 1.64228122         |                    | 0.04492807         |
| IXY,IXZ,IYZ = | -260.56904067      |  | -400.67427741      |                    | -140.10523674      |

-----

-----  
Fenchol-hydrate  
-----

parent species (FOH:DOH)

Planar calculation will be made from I.a and I.b

-----  
**EF-OD:DOH->EFOH:DOH**  
-----

The parent species:

|                 |               |              |              |
|-----------------|---------------|--------------|--------------|
| X, Y, Z =       | 1207.21600000 | 744.00295000 | 615.44832700 |
| eX, eY, eZ =    | 0.00160000    | 0.00013000   | 0.00009200   |
| IX, IY, IZ =    | 418.63179829  | 679.27016284 | 821.15586773 |
| eIX, eIY, eIZ = | 0.00055484    | 0.00011869   | 0.00012275   |
| PX, PY, PZ =    | 540.89711614  | 280.25875159 | 138.37304670 |
| Mass =          | 173.27460000  |              |              |

The isotopic species:

|                 |               |              |              |
|-----------------|---------------|--------------|--------------|
| X, Y, Z =       | 1197.55400000 | 740.39700000 | 614.30540000 |
| eX, eY, eZ =    | 0.05100000    | 0.01400000   | 0.00290000   |
| IX, IY, IZ =    | 422.00936659  | 682.57840726 | 822.68364400 |
| eIX, eIY, eIZ = | 0.01797203    | 0.01290672   | 0.00388371   |
| PX, PY, PZ =    | 541.62634233  | 281.05730167 | 140.95206493 |
| Mass change =   | 1.00627670    |              |              |
| Total mass =    | 174.28087670  |              |              |
| M DM/ (M+DM) =  | 1.00046658    |              |              |

KRAITCHMAN RESULTS:

|               |                    |  |                    |                    |                    |
|---------------|--------------------|--|--------------------|--------------------|--------------------|
|               | a                  |  | b                  |                    |                    |
| PLANAR:       | 1.80661 +- 0.00352 |  | 1.84901 +- 0.00492 |                    |                    |
| +Costain err. | 1.80661 +- 0.00362 |  | 1.84901 +- 0.00499 |                    |                    |
|               | a                  |  | b                  | c                  |                    |
| NONPLANAR:    | 0.84970 +- 0.00655 |  | 0.88649 +- 0.00624 | 1.61153 +- 0.00351 |                    |
| +Costain err. | 0.84970 +- 0.00678 |  | 0.88649 +- 0.00646 | 1.61153 +- 0.00363 |                    |
|               |                    |  |                    | R=                 | 2.02605 +- 0.00494 |
| DIX,DIY,DIZ = | 3.37756831         |  | 3.30824442         |                    | 1.52777627         |
| DPX,DPY,DPZ = | 0.72922619         |  | 0.79855008         |                    | 2.57901823         |
| IXY,IXZ,IYZ = | -260.63836455      |  | -402.52406944      |                    | -141.88570489      |

-----

-----  
Fenchol-hydrate  
-----

EF-H...DOD

Planar calculation will be made from I.a and I.b

-----  
**EF-D...D2O->EF-H...DOD**  
-----

The parent species:

|                 |               |              |              |
|-----------------|---------------|--------------|--------------|
| X, Y, Z =       | 1202.30490000 | 724.43428000 | 600.80981000 |
| eX, eY, eZ =    | 0.00170000    | 0.00011000   | 0.00012000   |
| IX, IY, IZ =    | 420.34179932  | 697.61884404 | 841.16303793 |
| eIX, eIY, eIZ = | 0.00059434    | 0.00010593   | 0.00016801   |
| PX, PY, PZ =    | 559.22004133  | 281.94299661 | 138.39880272 |
| Mass =          | 174.28083000  |              |              |

The isotopic species:

|                 |               |              |              |
|-----------------|---------------|--------------|--------------|
| X, Y, Z =       | 1192.78520000 | 721.01711000 | 599.76547000 |
| eX, eY, eZ =    | 0.00280000    | 0.00021000   | 0.00012000   |
| IX, IY, IZ =    | 423.69657588  | 700.92512090 | 842.62771080 |
| eIX, eIY, eIZ = | 0.00099461    | 0.00020415   | 0.00016859   |
| PX, PY, PZ =    | 559.92812791  | 282.69958289 | 140.99699299 |
| Mass change =   | 1.00627670    |              |              |
| Total mass =    | 175.28710670  |              |              |
| M DM/ (M+DM) =  | 1.00049993    |              |              |

KRAITCHMAN RESULTS:

|               |                    |  |                    |                    |                    |
|---------------|--------------------|--|--------------------|--------------------|--------------------|
|               | a                  |  | b                  |                    |                    |
| PLANAR:       | 1.80683 +- 0.00006 |  | 1.84203 +- 0.00032 |                    |                    |
| +Costain err. | 1.80683 +- 0.00083 |  | 1.84203 +- 0.00087 |                    |                    |
|               | a                  |  | b                  |                    | c                  |
| NONPLANAR:    | 0.83752 +- 0.00036 |  | 0.86280 +- 0.00034 | 1.61709 +- 0.00019 |                    |
| +Costain err. | 0.83752 +- 0.00183 |  | 0.86280 +- 0.00177 | 1.61709 +- 0.00095 |                    |
|               |                    |  |                    | R=                 | 2.01515 +- 0.00131 |
| DIX,DIY,DIZ = | 3.35477656         |  | 3.30627686         |                    | 1.46467286         |
| DPX,DPY,DPZ = | 0.70808658         |  | 0.75658628         |                    | 2.59819028         |
| IXY,IXZ,IYZ = | -277.27704472      |  | -420.82123861      |                    | -143.54419389      |

-----

-----  
Fenchol-hydrate  
-----

parent species EFD...HOD

Planar calculation will be made from I.a and I.b

-----  
**EF-D...D2O->EF-D...HOD**  
-----

The parent species:

|                 |               |              |              |
|-----------------|---------------|--------------|--------------|
| X, Y, Z =       | 1195.99600000 | 729.32010000 | 606.17140000 |
| eX, eY, eZ =    | 0.02800000    | 0.00450000   | 0.00840000   |
| IX, IY, IZ =    | 422.55910973  | 692.94539531 | 833.72294536 |
| eIX, eIY, eIZ = | 0.00989272    | 0.00427556   | 0.01155329   |
| PX, PY, PZ =    | 552.05461547  | 281.66832989 | 140.89077984 |
| Mass =          | 174.28083000  |              |              |

The isotopic species:

|                 |               |              |              |
|-----------------|---------------|--------------|--------------|
| X, Y, Z =       | 1192.78520000 | 721.01711000 | 599.76547000 |
| eX, eY, eZ =    | 0.00280000    | 0.00021000   | 0.00012000   |
| IX, IY, IZ =    | 423.69657588  | 700.92512090 | 842.62771080 |
| eIX, eIY, eIZ = | 0.00099461    | 0.00020415   | 0.00016859   |
| PX, PY, PZ =    | 559.92812791  | 282.69958289 | 140.99699299 |
| Mass change =   | 1.00627670    |              |              |
| Total mass =    | 175.28710670  |              |              |
| M DM/ (M+DM) =  | 1.00049993    |              |              |

KRAITCHMAN RESULTS:

|               |                    |  |                    |                    |                    |
|---------------|--------------------|--|--------------------|--------------------|--------------------|
|               | a                  |  | b                  |                    |                    |
| PLANAR:       | 2.81819 +- 0.00076 |  | 1.08187 +- 0.00473 |                    |                    |
| +Costain err. | 2.81819 +- 0.00093 |  | 1.08187 +- 0.00493 |                    |                    |
|               | a                  |  | b                  | c                  |                    |
| NONPLANAR:    | 2.79956 +- 0.00141 |  | 1.02954 +- 0.00395 | 0.33013 +- 0.01230 |                    |
| +Costain err. | 2.79956 +- 0.00151 |  | 1.02954 +- 0.00421 | 0.33013 +- 0.01312 |                    |
|               |                    |  |                    | R=                 | 3.00108 +- 0.00248 |
| DIX,DIY,DIZ = | 1.13746615         |  | 7.97972560         |                    | 8.90476544         |
| DPX,DPY,DPZ = | 7.87351244         |  | 1.03125300         |                    | 0.10621315         |
| IXY,IXZ,IYZ = | -270.38628558      |  | -411.16383563      |                    | -140.77755005      |

-----  
-----
